# Supplementary material for: A highly stretchable and sensitive carboxymethyl chitosan-based hydrogel for flexible strain sensors
Source: Royal Society of Chemistry journal article supplement (doi:10.1039/d3tc02777e), 2023-01-01
Supplement: d3tc02777e1.pdf [file d3tc02777e1.pdf]

## *Supplementary Information (SI)*

### **Highly stretchable and sensitive carboxymethyl chitosan-based hydrogel for flexible strain sensors**

Haote Liu,<sup>a,#</sup> Lin Cao,<sup>a,b,#</sup> Xiao Wang,<sup>a</sup> Congjie Xu,<sup>a</sup> Haoling Huo,<sup>a</sup> Bixia Jiang,<sup>a</sup> Hong Yuan,<sup>\*b,c</sup>  
Zhidan Lin,<sup>\*\*a</sup> and Peng Zhang,<sup>\*\*\*a</sup>

<sup>a</sup> Institute of Advanced Wear & Corrosion Resistant and Functional Materials, Jinan University, Guangzhou 510632, China.

<sup>b</sup> MOE Key Lab of Disaster Forecast and Control in Engineering, Institute of Applied Mechanics, Jinan University, Guangzhou, 510632, China.

<sup>c</sup> School of Architectural Engineering, Guangzhou Institute of Science and Technology, Guangzhou 510540, China.

<sup>#</sup> These authors contributed equally to this work and should be considered co-first authors

\* Corresponding author: tyuanhong@jnu.edu.cn (Hong Yuan).

\*\* Corresponding author: linzd@jnu.edu.cn (Zhidan Lin).

\*\*\* Corresponding author: tzhangpeng@jnu.edu.cn (Peng Zhang).

E-mail address: cao193@jnu.edu.cn. Tel: +86-20-85220890. Fax: +86-20-85220890.

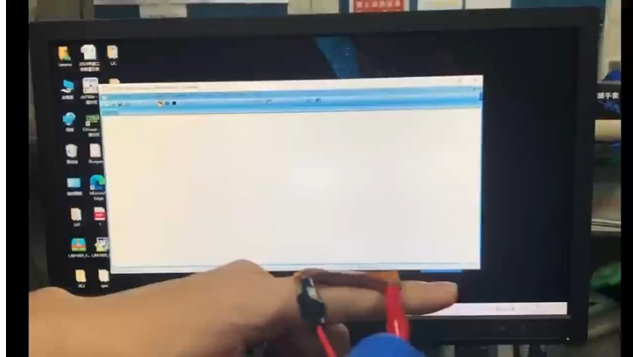

**File. S1** The video of real-time motion detection of finger joints.

In the video, we cut the hydrogel into  $30\text{ mm} \times 10\text{ mm} \times 1\text{ mm}$  size. The CGT3-I3 hydrogel was connected to the electrochemical workstation using copper wires. The hydrogel was attached to the knuckles of volunteers to monitor movement. Sensing data can be obtained in real time on the electrochemical workstation (Chi760E workstation, Austin, Texas, the United States). At the end of the video, we can clearly see that the electrical signal of the CGT3-I3 hydrogel material is stable. The CGT3-I3 hydrogel material with excellent sensing effect can be adapted to monitor early symptoms of Parkinsonism.

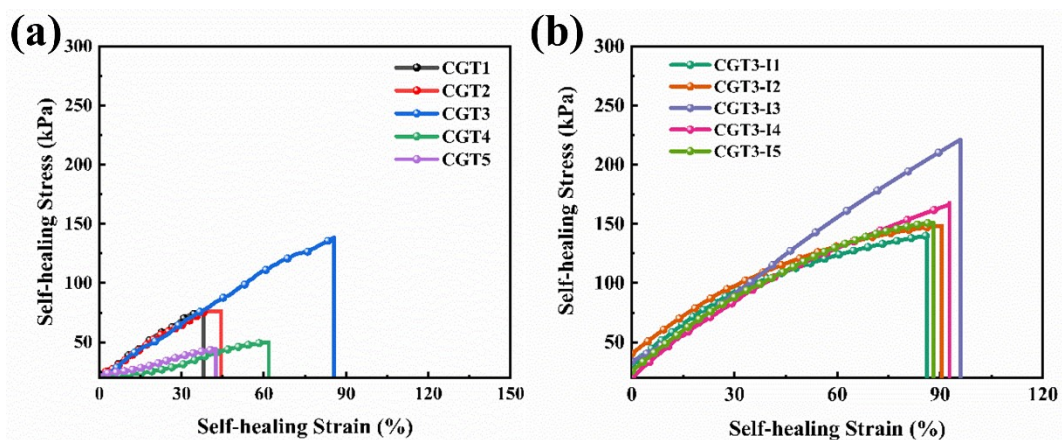

**Fig. S1** The tensile test of (a) CGTX and (b) CGT3-IX hydrogels after incision and self-healing for 24 hours.

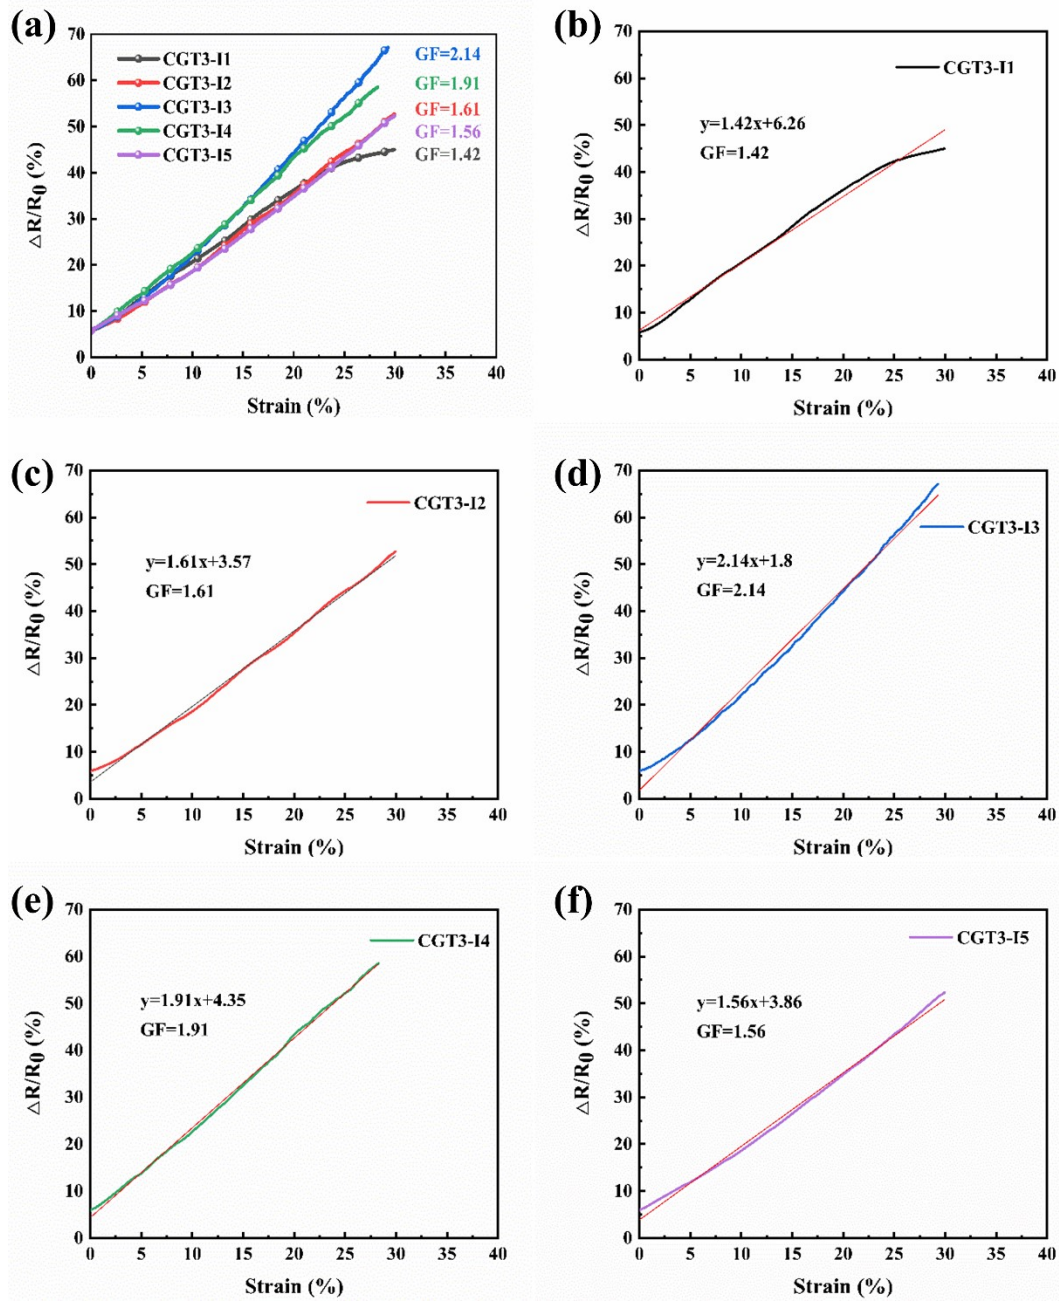

**Fig. S2** (a) Relative resistance changes ( $\Delta R/R_0$ ) and corresponding gauge factor (GF) of different CGT3-IX hydrogels. (b)-(f) The gauge factor (GF) variation was calculated from the linear fitting of different CGT3-IX hydrogels under 0-30% strain.
